# Supplementary material for: Different Estradiol Level's Impact on Appetite Regulation, Food Intake, and Concentrations of Leptin, Glucagon-Like Peptide-1, and High-Sensitivity C-Reactive Protein During a Long Agonist IVF Protocol
Source: Research Square preprint supplement (doi:10.21203/rs.3.rs-1192036/v1), 2021-12-28
Supplement: Supplementary file 1 [file 33bc9416eb50db50e89c3d2c.docx]

Table 3. Statistically significant correlations between leptin and/or hs-CRP and selected variables in Visits 1, 2, and 3. Spearman correlation coefficient was used.

leptin hs-CRP

1 2 3 1 2 3

r r r r r r

Insulin 0.494¤ 0.331* 0.482¤ -0.332*

(mU/l)

Total 0.310* 0.290* 0.407*

cholesterol

(mmol/l)

Low-density 0.343* 0.398* 0.462**

lipoprotein

(mmol/l)

High-density -0.272# -0.364* -0.332*

lipoprotein

(mmol/l)

Triglycerides 0.469¤ 0.471** 0.589** 0.379* 0.447¤

(mmol/l)

Weight (kg) 0.685** 0.735** 0.668** 0.429¤ 0.393* 0.514**

Leptin pg/ml) 0.505** 0.426* 0.487**

Significances: ¤ = P=0.001, * = P<0.05, ** = P<0.001, # = P=0.001.
