# Supplementary material for: Different Estradiol Level's Impact on Appetite Regulation, Food Intake, and Concentrations of Leptin, Glucagon-Like Peptide-1, and High-Sensitivity C-Reactive Protein During a Long Agonist IVF Protocol
Source: Research Square preprint supplement (doi:10.21203/rs.3.rs-1192036/v1), 2021-12-28
Supplement: Supplementary file 2 [file c21db01efa8243eb9c2e0ce3.docx]

Table 1. Clinical characteristics and responses to a long agonist IVF protocol.

Visit 1 Visit 2 Visit 3 P-value

Age (Years) 33±4 - - -

Gravity 0.6±0.9 - - -

Para 0.3±0.5 - - -

Height (cm) 166±5 - - -

Weight (kg) 69.9±14.3 69.9±14.1 69.7±13.8 -

Body mass index (kg/m2) 25.3±5.2 25.3±5.1 25.3±5 -

Glucagon-like peptide (pg/ml) 34.1±5.8 33±5.4 33.1±5.6 NS

Leptin (pg/ml)a 17887.3 16113.4 21356 <0.001

±13661.2# ±14397.3§ ±16038.2

High-sensitive C-reactive protein 3.5±8*# 2.3±5.1 1.8±3.5 0.03

(mg/l)

Insulin (mU/l)b 6.9±3 7±4.7 8.2±7.3 NS

Glucose (mmol/l)c 5.3±0.4# 5.3±0.4¤ 5.1±0.4 0.002

Haemoglobin A1c (mmol/mol)c 32.9±2.5 32.8±2.8 32.6±2.7 NS

Total cholesterol (mmol/l) 4.7±0.8*† 4.9±0.8§ 4.5±0.7 <0.001

LDL cholesterol (mmol/l) 2.8±0.7*† 2.9±0.7§ 2.5±0.7 <0.001

HDL cholesterol (mmol/l) 1.7±0.3 1.7±0.3 1.7±0.3 NS

Triglycerides (mmol/l) 0.8±0.3 0.8±0.3 0.8±0.3 NS

Total/HDL cholesterol 2.9±0.8† 3±0.7§ 2.7±0.7 <0.001

Estradiol (nmol/l) 0.2±0.1‡† 0.1±0.1§ 6.4±5.5 <0.001

Estradiol (nmol/l)• 0.04-0.75 0.04-0.61 0.63-31.5

The values are means±SD.

Significances: • * P<0.05 Visit 1 vs Visit 2, # P<0.05 Visit 1 vs Visit 3, § P<0.001 Visit 2 vs Visit 3, ¤ P<0.05 Visit 2 vs Visit 3, † P<0.001 Visit 1 vs Visit 3, ‡ P<0.001 Visit 1 vs Visit 2, • A range of estradiol values.

a n=44, b n=48, c n=53.
